# Supplementary material for: Multiple-to-Multiple Relationships between MicroRNAs and Target Genes in Gastric Cancer
Source: PLoS One. 2013 May 8;8(5):e62589. doi: 10.1371/journal.pone.0062589 (PMC3648557; doi:10.1371/journal.pone.0062589)
Supplement: Table S2 — List of target genes of which expression we examined by RT-PCR after treatment with or without 5-aza-CdR, and transfection with 20 nmol/L of siDICER1 or scrambled siRNA. (XLSX) [file pone.0062589.s004.xlsx]

## Sheet: Table S2
Table S2. The target genes of which expression we examined by RT-PCR after treatment with or without 5-aza-CdR, and transfection with 20 nmol/L of siDICERI or scrambled siRNA
Gene Symbol	Gene name	miRNA name
DPYSL2/CRMP2	dihydropyrimidinase-like 2	miR-145/-181c/-224/-545
KRAS	v-Ki-ras2 Kirsten rat sarcoma viral oncogene homolog	miR-181c/-206/-326/-338-5p/-384/-433
MECP2	methyl CpG binding protein 2	miR-124/-133/-152/-181c/-186/-211/-212/-326/-338-5p/-340/-433/-544/-545
CAMK2G	calcium/calmodulin-dependent protein kinase II gamma	miR-181c/-452h/-495/-520/-525-5p/-544
DEK	DEK oncogene	miR-181c/-186/-340
E2F1	E2F transcription factor 1	miR-302
E2F5	E2F transcription factor 5, p130-binding	miR-124/-181c/-206/-212/-302/-449
GRB10	growth factor receptor-bound protein 10	miR-125b/-145/-181c/-385p/-340
HNRNPA1	heterogeneous nuclear ribonucleoprotein A1	miR-326/-383/-503
MAPK1	mitogen-activated protein kinase 1	miR-124/-181c/-186/-206/-211/-212/-338-5p/-384/-512-3p
MET	met proto-oncogene	miR-152/-206/-340/-449/-495
PPP3CA	protein phosphatase 3, catalytic subunit, alpha isoform	miR-145/-142-3p/-212/-338-5p/-340/-495/-512-3p/-545
TET1	tet oncogene 1	miR-124/-302
